# Supplementary material for: Emission metrics for quantifying regional climate impacts of aviation
Source: Copernicus journal article supplement (doi:10.5194/esd-2017-11), 2017-02-07
Supplement: Supplementary file 1 [file esd-2017-11-supplement.pdf]

1 [Supporting material for “Emission metrics for quantifying regional climate impacts of aviation”](#)  
2 *Marianne T. Lund, Borgar Aamaas, Terje Berntsen, Lisa Bock, Ulrike Burkhardt, Jan S.*  
3 *Fuglestedt, Keith P. Shine*

4

5 *Table SI 1: Global and regional aviation emissions used in this study. Emissions are for year 2006*  
6 *and from the AEDT inventory (Wilkerson et al., 2010). Also included is the accumulated flight*  
7 *distance in each region.*

| Source region | BC (kg yr <sup>-1</sup> ) | NOx (kgN yr <sup>-1</sup> ) | OC (kg yr <sup>-1</sup> ) | SO2 (kg yr <sup>-1</sup> ) | CO2 (kg yr <sup>-1</sup> ) | Flight distance (km) |
|---------------|---------------------------|-----------------------------|---------------------------|----------------------------|----------------------------|----------------------|
| Global        | 5.9E+06                   | 8.1E+08                     | 6.4E+06                   | 2.3E+08                    | 5.9E+11                    | 6.7E+10              |
| SAF           | 4.0E+05                   | 5.6E+07                     | 3.6E+05                   | 1.4E+07                    | 3.8E+10                    | 2.5E+09              |
| NAM           | 2.2E+06                   | 2.9E+08                     | 2.0E+06                   | 8.2E+07                    | 2.2E+11                    | 1.8E+10              |
| EAS           | 9.8E+05                   | 1.6E+08                     | 1.1E+06                   | 3.8E+07                    | 1.0E+11                    | 4.6E+09              |
| EUR           | 1.5E+06                   | 2.2E+08                     | 2.1E+06                   | 5.8E+07                    | 1.5E+11                    | 8.9E+09              |
| SPO           | 4.6E+05                   | 7.1E+07                     | 4.8E+05                   | 1.8E+07                    | 4.6E+10                    | 2.4E+09              |
| SAS           | 2.5E+05                   | 4.1E+07                     | 2.3E+05                   | 9.5E+06                    | 2.5E+10                    | 1.6E+09              |

8

9

10 *Table SI 2: Radiative forcing (Wm<sup>-2</sup>) by component, source region and latitude band for input to*  
11 *emission metric calculations.*

| Component       | Source region | Radiative forcing (Wm <sup>-2</sup> ) |          |         |          |          |
|-----------------|---------------|---------------------------------------|----------|---------|----------|----------|
|                 |               | Global                                | 90-28S   | 28S-28N | 28-60N   | 60-90N   |
| Contrail-cirrus | Global        | 1.9E-02                               | 2.3E-03  | 3.5E-02 | 2.1E-01  | 2.6E-02  |
|                 | SAF           | 2.0E-03                               | 5.9E-04  | 8.1E-03 | 1.2E-04  | 1.1E-09  |
|                 | NAM           | 5.3E-03                               | -1.9E-10 | 9.7E-03 | 9.3E-02  | 6.9E-03  |
|                 | EAS           | 4.0E-03                               | -6.0E-10 | 5.4E-03 | 1.3E-02  | 1.5E-03  |
|                 | EUR           | 3.0E-03                               | 2.5E-10  | 1.5E-04 | 6.1E-02  | 8.8E-03  |
|                 | SPO           | 3.1E-03                               | 9.1E-04  | 6.2E-03 | -1.3E-06 | 3.2E-11  |
|                 | SAS           | 1.6E-03                               | -2.5E-10 | 3.7E-03 | 7.6E-04  | 1.2E-08  |
| Ozone           | Global        | 1.9E-02                               | 4.8E-03  | 2.0E-02 | 3.6E-02  | 2.3E-02  |
|                 | SAF           | 2.0E-03                               | 1.4E-03  | 2.9E-03 | 1.0E-03  | 2.5E-04  |
|                 | NAM           | 5.3E-03                               | 7.0E-05  | 4.0E-03 | 1.4E-02  | 8.4E-03  |
|                 | EAS           | 4.0E-03                               | 3.6E-04  | 4.8E-03 | 6.9E-03  | 3.8E-03  |
|                 | EUR           | 3.0E-03                               | 4.7E-05  | 1.3E-03 | 9.0E-03  | 8.2E-03  |
|                 | SPO           | 3.1E-03                               | 2.5E-03  | 4.8E-03 | 7.8E-04  | -5.1E-05 |

|         | SAS    | 1.6E-03  | 7.0E-05  | 2.2E-03  | 2.4E-03  | 6.6E-04  |
|---------|--------|----------|----------|----------|----------|----------|
| BC      | Global | 5.7E-04  | 9.7E-05  | 5.2E-04  | 1.3E-03  | 6.6E-04  |
|         | SAF    | 5.4E-05  | 2.8E-05  | 8.2E-05  | 2.6E-05  | 9.9E-06  |
|         | NAM    | 1.9E-04  | 1.8E-06  | 1.3E-04  | 5.9E-04  | 2.7E-04  |
|         | EAS    | 1.0E-04  | 9.0E-06  | 1.1E-04  | 2.0E-04  | 1.0E-04  |
|         | EUR    | 1.1E-04  | 1.4E-06  | 4.7E-05  | 4.0E-04  | 2.2E-04  |
|         | SPO    | 5.6E-05  | 4.9E-05  | 8.5E-05  | 1.3E-05  | 7.3E-06  |
|         | SAS    | 5.0E-05  | 3.8E-06  | 6.4E-05  | 7.7E-05  | 3.3E-05  |
| OC      | Global | -4.6E-05 | -4.7E-06 | -4.9E-05 | -9.9E-05 | -2.1E-05 |
|         | SAF    | -4.4E-06 | -1.4E-06 | -7.3E-06 | -1.6E-06 | -2.5E-07 |
|         | NAM    | -1.5E-05 | -6.4E-08 | -1.3E-05 | -4.1E-05 | -7.8E-06 |
|         | EAS    | -7.7E-06 | -4.0E-07 | -1.0E-05 | -1.2E-05 | -2.9E-06 |
|         | EUR    | -1.0E-05 | -5.3E-08 | -5.3E-06 | -3.8E-05 | -8.8E-06 |
|         | SPO    | -5.1E-06 | -2.5E-06 | -8.5E-06 | -8.7E-07 | -2.1E-07 |
|         | SAS    | -3.6E-06 | -1.4E-07 | -5.4E-06 | -4.2E-06 | -8.3E-07 |
| Sulfate | Global | -3.2E-03 | -2.2E-04 | -3.5E-03 | -6.5E-03 | -2.0E-03 |
|         | SAF    | -3.0E-04 | -9.9E-05 | -5.0E-04 | -1.1E-04 | -1.8E-05 |
|         | NAM    | -1.1E-03 | 3.6E-06  | -1.0E-03 | -3.0E-03 | -8.5E-04 |
|         | EAS    | -5.8E-04 | -3.2E-06 | -7.5E-04 | -9.7E-04 | -2.7E-04 |
|         | EUR    | -5.5E-04 | 1.0E-06  | -2.9E-04 | -1.9E-03 | -7.8E-04 |
|         | SPO    | -3.3E-04 | -1.1E-04 | -5.8E-04 | -4.1E-05 | 7.2E-06  |
|         | SAS    | -2.7E-04 | -2.9E-06 | -3.8E-04 | -3.5E-04 | -7.8E-05 |
| Nitrate | Global | -3.2E-04 | -5.6E-07 | -2.8E-04 | -9.7E-04 | -4.1E-05 |
|         | SAF    | -1.2E-05 | -1.9E-07 | -1.7E-05 | -1.9E-05 | -4.8E-08 |
|         | NAM    | -9.4E-05 | 5.8E-10  | -8.0E-05 | -2.8E-04 | -1.3E-05 |
|         | EAS    | -3.2E-05 | 6.0E-09  | -2.4E-05 | -1.1E-04 | -6.1E-06 |
|         | EUR    | -1.1E-04 | -3.9E-09 | -6.7E-05 | -4.2E-04 | -1.9E-05 |
|         | SPO    | -5.9E-06 | -3.5E-07 | -8.3E-06 | -8.5E-06 | -1.8E-08 |
|         | SAS    | -4.1E-05 | 1.7E-09  | -5.7E-05 | -6.4E-05 | -3.2E-07 |
| Methane | Global | -9.3E-03 | -6.8E-03 | -1.1E-02 | -8.6E-03 | -6.1E-03 |
|         | SAF    | -1.1E-03 | -8.3E-04 | -1.4E-03 | -1.0E-03 | -7.4E-04 |
|         | NAM    | -2.7E-03 | -2.0E-03 | -3.3E-03 | -2.5E-03 | -1.8E-03 |
|         | EAS    | -1.7E-03 | -1.2E-03 | -2.0E-03 | -1.5E-03 | -1.1E-03 |
|         | EUR    | -1.5E-03 | -1.1E-03 | -1.8E-03 | -1.4E-03 | -9.7E-04 |
|         | SPO    | -1.2E-03 | -9.0E-04 | -1.5E-03 | -1.1E-03 | -8.1E-04 |
|         | SAS    | -6.1E-04 | -4.5E-04 | -7.4E-04 | -5.6E-04 | -4.0E-04 |

12

13

14

15

16

17

18 *Table SI 3: Global and regional GWP and GTP for time horizons 20 and 100 years of contrail-*  
19 *cirrus, calculated per km accumulated distance. The GTPs are calculated using the impulse*  
20 *response function by Boucher and Reddy (2008) and values are given relative to CO<sub>2</sub> using CO<sub>2</sub>*  
21 *parameters from Joos et al. (2013).*

| Component       | Source region | GWP  |       | GTP  |       |
|-----------------|---------------|------|-------|------|-------|
|                 |               | H=20 | H=100 | H=20 | H=100 |
| Contrail-cirrus | Global        | 34   | 9     | 10   | 1.3   |
|                 | SAF           | 69   | 19    | 21   | 2.7   |
|                 | NAM           | 51   | 14    | 15   | 2.0   |
|                 | EAS           | 45   | 12    | 14   | 1.8   |
|                 | EUR           | 53   | 14    | 16   | 2.1   |
|                 | SPO           | 55   | 15    | 17   | 2.1   |

22

23

24

25

26

27

28

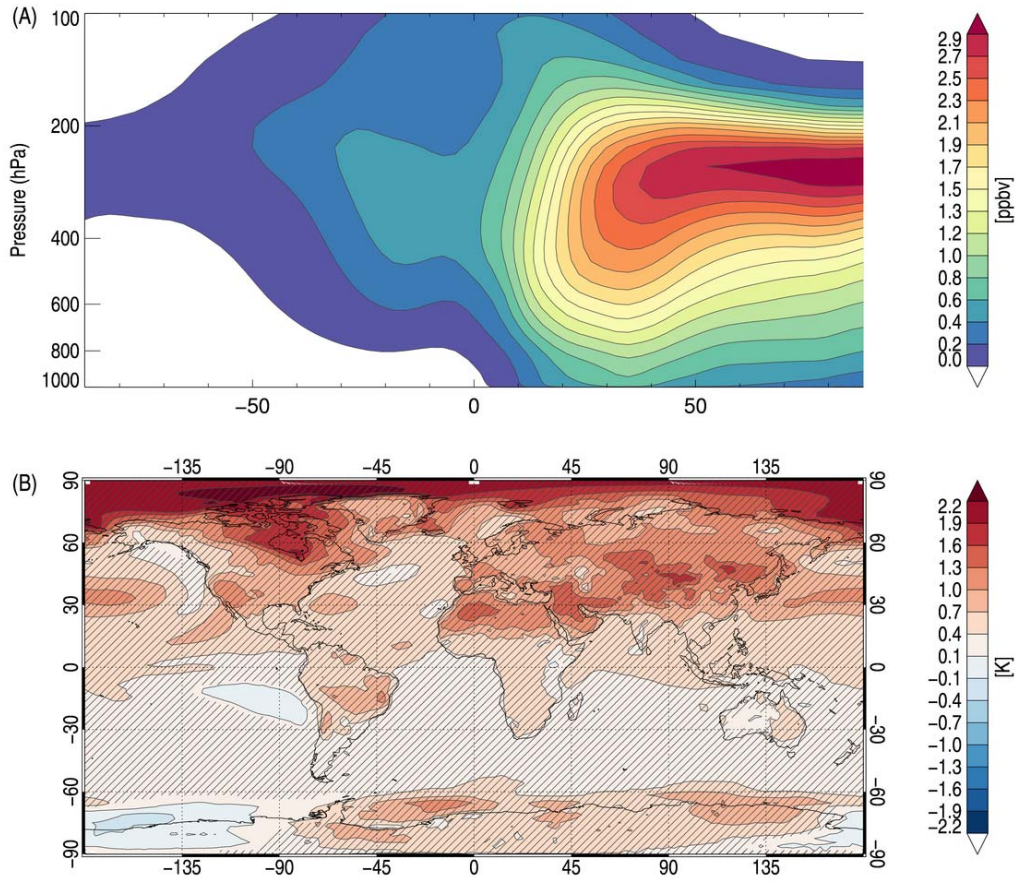

29

30 *Figure SI 1: (A) Annual mean global aviation-induced ozone concentration from OsloCTM3 and*  
 31 *(B) annual mean surface temperature response to the aviation ozone perturbation from CESM1.2.*  
 32 *Hatching indicates statistical significance at the 0.05 level.*

33

34

35

36

37

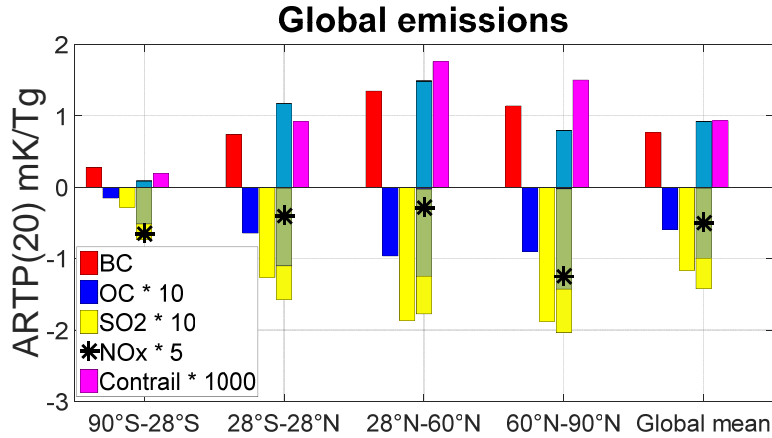

38

39 *Figure SI 2: ARTP(20) for BC, OC, SO<sub>2</sub>, NO<sub>x</sub> and contrail-cirrus for global aviation emissions.*

40 *The NO<sub>x</sub> ARTP(20) is comprised of contributions from ozone (blue), methane (green) and*

41 *methane-induced ozone (yellow) changes.*

42

43

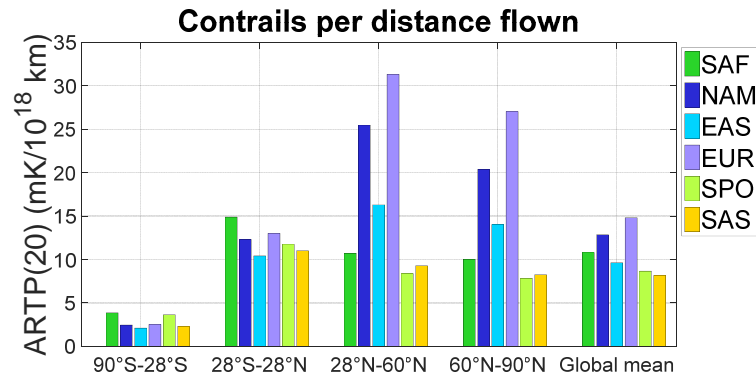

44

45 *Figure SI 3: ARTP(20) of aviation-induced contrail-cirrus calculated per accumulated km*

46 *distance.*

47

48

49

50

51

52

53

54 **References**

55 Joos F., Roth R., Fuglestvedt J. S., Peters G. P., Enting I. G., von Bloh W., Brovkin V., Burke E. J., Eby M.,  
56 Edwards N. R., Friedrich T., Frölicher T. L., Halloran P. R., Holden P. B., Jones C., Kleinen T., Mackenzie F.  
57 T., Matsumoto K., Meinshausen M., Plattner G. K., Reisinger A., Segschneider J., Shaffer G., Steinacher  
58 M., Strassmann K., Tanaka K., Timmermann A. & Weaver A. J. (2013). Carbon dioxide and climate  
59 impulse response functions for the computation of greenhouse gas metrics: a multi-model analysis.  
60 *Atmos. Chem. Phys.* 13(5), 2793-2825, DOI: 10.5194/acp-13-2793-2013.

61 Wilkerson J. T., Jacobson M. Z., Malwitz A., Balasubramanian S., Wayson R., Fleming G., Naiman A. D. &  
62 Lele S. K. (2010). Analysis of emission data from global commercial aviation: 2004 and 2006. *Atmos.*  
63 *Chem. Phys.* 10(13), 6391-6408, DOI: 10.5194/acp-10-6391-2010.

64
